# Supplementary material
Source: HighWire-hosted journal article supplement (https://www.life-science-alliance.org/content/6/3/e202201583/F2)
Supplement: inline-supplementary-material-1 [file inline-supplementary-material-1.pdf]

**D.**

|            | Percentage of CDH5-Ck positive cells |      |
|------------|--------------------------------------|------|
|            | TS                                   | DIFF |
| Replicate1 | 0.2                                  | 11.6 |
| Replicate2 | 3                                    | 9    |
| Replicate3 | 1                                    | 14   |

**E.**

|            | Percentage of PECAM1-Ck positive cells |      |
|------------|----------------------------------------|------|
| Replicate1 | 0.1                                    | 36.2 |
| Replicate2 | 0.2                                    | 44.7 |
| Replicate3 | 0.5                                    | 28   |

**F.**

|            | Percentage of ENG-Ck positive cells |      |
|------------|-------------------------------------|------|
| Replicate1 | 0.2                                 | 35.4 |
| Replicate2 | 0.1                                 | 30.1 |
| Replicate3 | 0.5                                 | 20   |
